# Supplementary material for: A method for partitioning dissolved polycyclic aromatic hydrocarbons associated with humic substances using polyethylenimine-coated glass fiber filters
Source: Royal Society of Chemistry journal article supplement (doi:10.1039/d1ra04953d), 2021-01-01
Supplement: d1ra04953d1.pdf [file d1ra04953d1.pdf]

## Supporting Information

1

2

3 **A method for partitioning dissolved polycyclic aromatic hydrocarbons associated**  
4 **with humic substances using polyethylenimine-coated glass fiber filters**

5

6

7 Hisanori Iwai,<sup>\*a</sup> Rodrigo Mundo,<sup>b</sup> and Seiya Nagao<sup>a</sup>

8

9 <sup>a</sup> *Low-Level Radioactivity Laboratory, Institute of Nature and Environmental*  
10 *Technology, Kanazawa University, Nomi 923-1224, Japan*

11 <sup>b</sup> *Division of Material Chemistry, Graduate School of Natural Science and Technology,*  
12 *Kanazawa University, Kanazawa 920-1192, Japan*

13

14

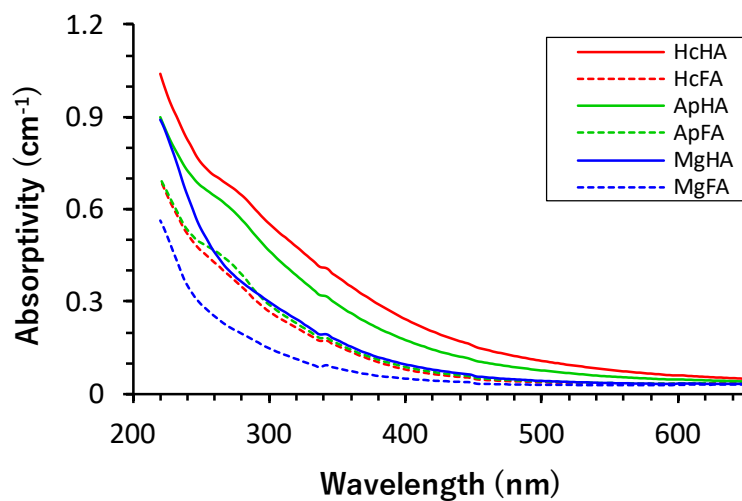

15

16

17 **Figure S1.** UV-vis spectra of HSs. Solid and dashed lines represent the spectra of HAs  
18 and FAs, respectively. The following colors indicate the origins of the HSs; red, green,  
19 and blue represent hardwood bark compost, Aberdeenshire peat, and Mobarra  
20 groundwater, respectively.

21

22
